# Supplementary material
Source: Royal Society of Chemistry journal article supplement (doi:10.1039/d6mh00036c)
Supplement: d6mh00036c1.pdf [file d6mh00036c1.pdf]

## Supporting Information

### **Friction-Assisted Electrochemical Oxidation of Iridium Surfaces for Enhanced Catalysis**

Chenxu Liu<sup>#\*</sup>, Johannes L. Hörmann<sup>#</sup>, Haoran Pan<sup>#</sup>, Hantao Xu, Lianhuan Han, Jun Cheng, Xingxing Chen<sup>\*</sup>, Hongbo Zeng<sup>\*</sup>, Yonggang Meng<sup>\*</sup>, Yu Tian<sup>\*</sup>

\*Corresponding author. Email: [mengyg@tsinghua.edu.cn](mailto:mengyg@tsinghua.edu.cn), [tianyu@mail.tsinghua.edu.cn](mailto:tianyu@mail.tsinghua.edu.cn), [hongbo.zeng@ualberta.ca](mailto:hongbo.zeng@ualberta.ca), [xingchenstar@ustl.edu.cn](mailto:xingchenstar@ustl.edu.cn), [liuchenxu19910407@163.com](mailto:liuchenxu19910407@163.com).

**This PDF file includes:**

Fig. S1. Schematic illustration of the setup for friction-assisted localized electrochemical oxidation of Ir and the resulting IrO<sub>x</sub> formed on the Ir surface measured by TOF-SIMS.

Fig. S2. XPS spectra of the Ir 4f of the IrO<sub>x</sub> layer recorded as sputtering depth increases.

Fig. S3. 3D morphology (a) and profile (b) of the wear track on Ir plate surface, after the ToF-SIMS measurement.

Fig. S4. Effect of velocity, normal load and sliding time on the formation of IrO<sub>x</sub> on Ir surface.

Fig. S5. Effect of surface potential on the formation of IrO<sub>x</sub> on Ir surface.

Fig. S6. Mechanical properties of the friction-assisted electrochemical IrO<sub>x</sub> layer.

Fig. S7. The diagram of the scanning electrochemical microscopy for the electrochemical activity measurement of Ir and IrO<sub>x</sub> mixture.

Fig. S8. OER activity distribution on the surface of Ir-IrO<sub>x</sub> at potentials of (a) 1.49 V<sub>RHE</sub> and (b) 1.50 V<sub>RHE</sub>.

Fig. S9. (a-c) CV curves at different scan rates (5~40 mV s<sup>-1</sup>) for IrO<sub>2</sub>, Ir and IrO<sub>x</sub>. (d) Electrochemical double-layer capacitance. (e) OER activity comparison of IrO<sub>2</sub>, Ir and IrO<sub>x</sub> using ECSA-based analysis.

Fig. S10. Chronopotentiometry of OER at constant potential of 1.65 V.

Fig. S11. XPS spectrum of the Ir 4f of the original wear surface on the lower friction pair after the OER measurements.

Fig. S12. XPS spectra of the Ir 4f of the IrO<sub>x</sub> layer after the OER measurements recorded as sputtering depth increases.

Fig. S13. Microscopic morphologies of rough and smooth Ir metal surfaces before performing any friction test.

Fig. S14. Effect of surface potential on the formation of IrO<sub>x</sub> on Ir surface. The parameters of the friction experiment are marked in the figure.

Fig. S15. Surface morphologies of the ZrO<sub>2</sub> ball after the friction test of 200 s with pure water as lubricant under a positive surface potential of +0.6 V (Ag/AgCl as the reference electrode).

Fig. S16. 3D morphologies of wear tracks on Ir plates with varying surface roughness under different normal loads.

Table S1. Comparison of the overpotential at 10 mA cm<sup>-2</sup> between the friction-induced amorphous IrO<sub>x</sub> layer in this work and recently reported amorphous IrO<sub>2</sub>-based catalysts.

Supplementary references

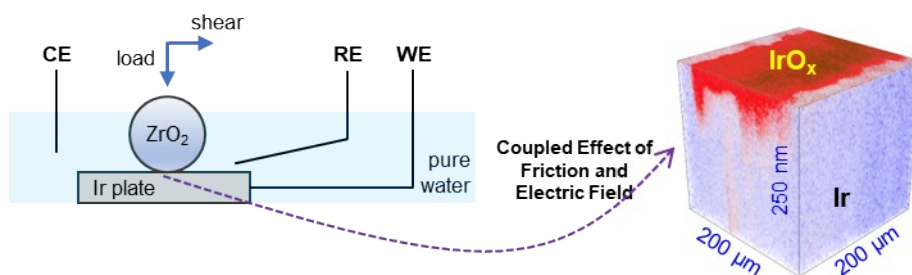

**Fig. S1. Schematic illustration of the setup for friction-assisted localized electrochemical oxidation of Ir and the resulting  $\text{IrO}_x$  formed on the Ir surface measured by TOF-SIMS.**

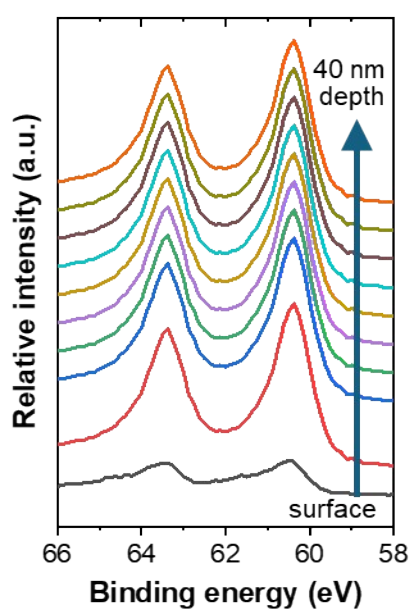

**Fig. S2. XPS spectra of the Ir 4f of the  $\text{IrO}_x$  layer recorded as sputtering depth increases. Sampling area:  $50 \times 50 \mu\text{m}$ ; sputtering depth: 4.44 nm per interval.**

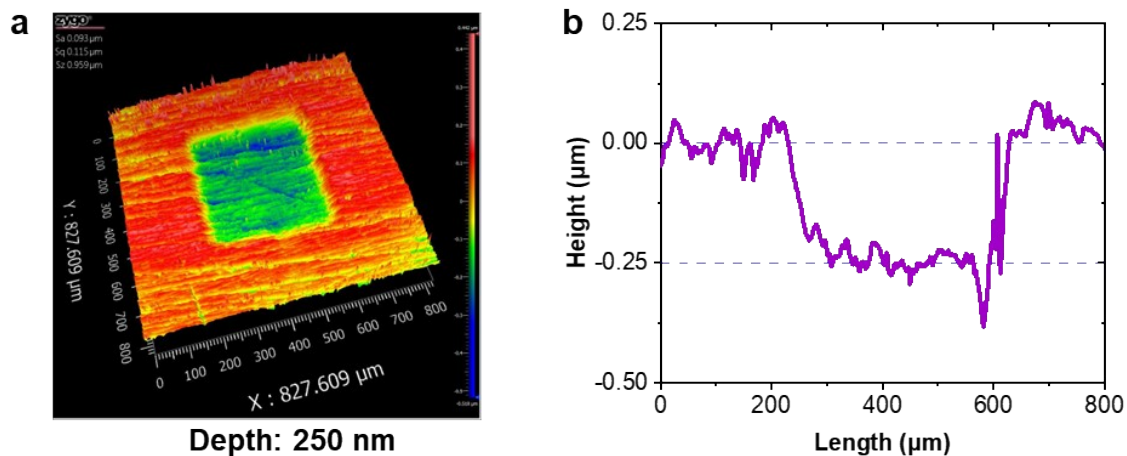

**Fig. S3. 3D morphology (a) and profile (b) of the wear track on Ir plate surface, after the ToF-SIMS measurement.** The splash time was 1200 s, and the sputtering depth measured by a 3D optical profiling instrument (ZYGO NexView, USA) was about 250 nm.

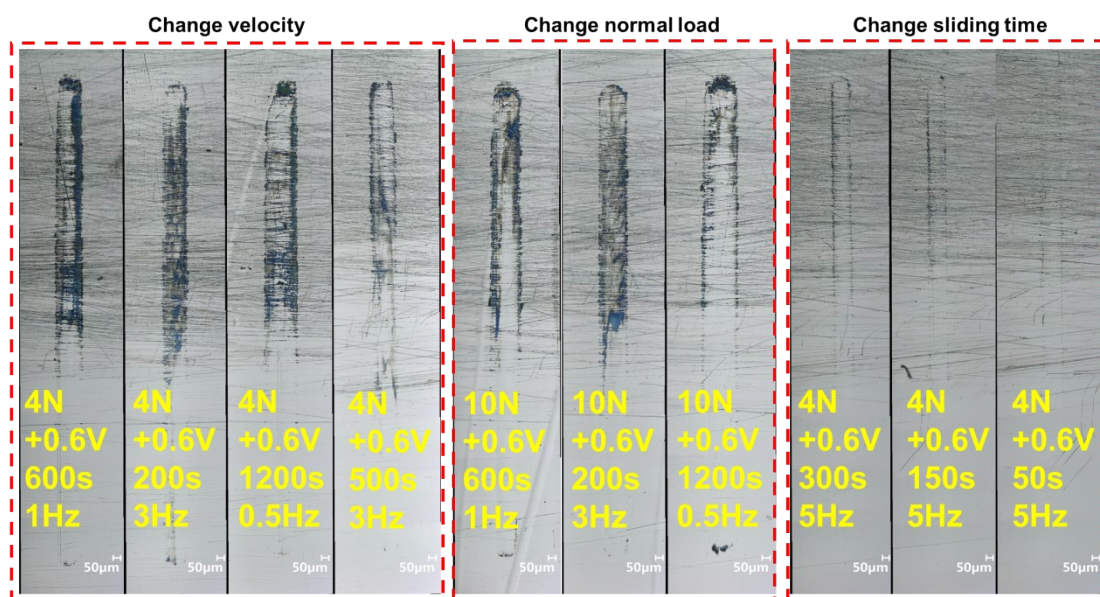

**Fig. S4. Effect of velocity, normal load and sliding time on the formation of IrO<sub>x</sub> on Ir surface.** The parameters of the friction experiment are marked in the figure.

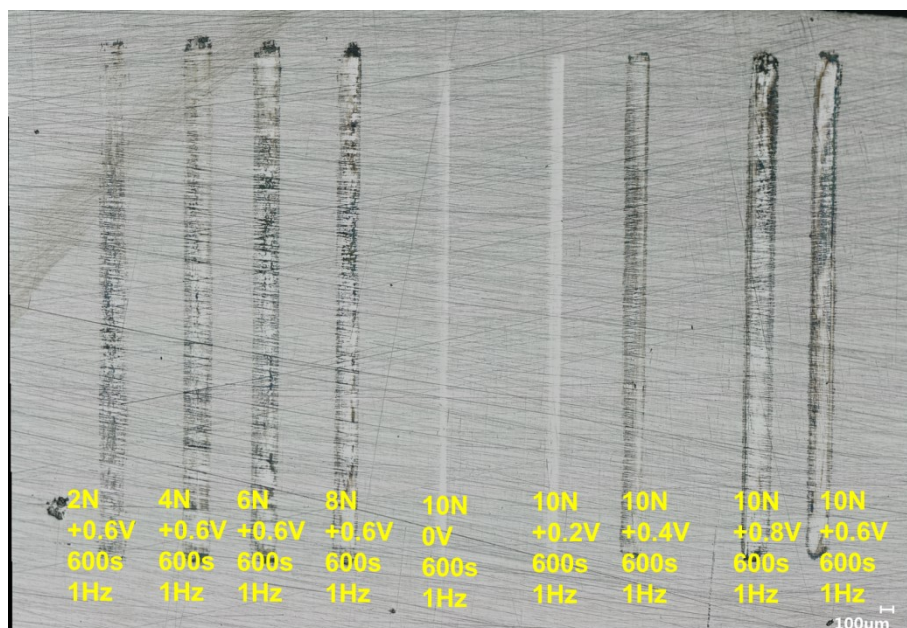

**Fig. S5. Effect of surface potential on the formation of IrO<sub>x</sub> on Ir surface.** The parameters of the friction experiment are marked in the figure.

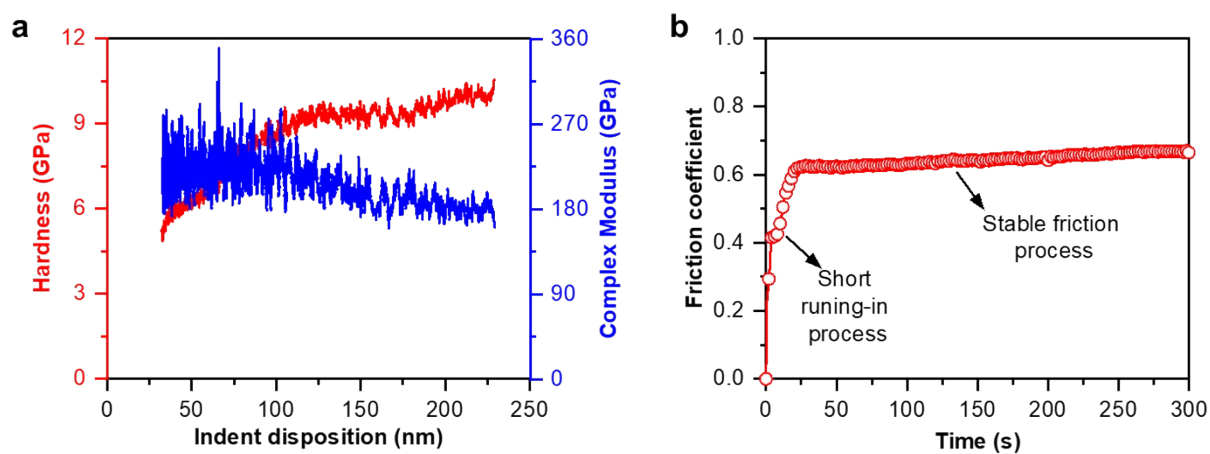

**Fig. S6. Mechanical properties of the friction-assisted electrochemical IrO<sub>x</sub> layer.** (a) Depth-dependent hardness and complex modulus; (b) Variation of the friction coefficient between the oxide layer and ZrO<sub>2</sub> ball (with a diameter of 6.35 mm, under 4 N) over time.

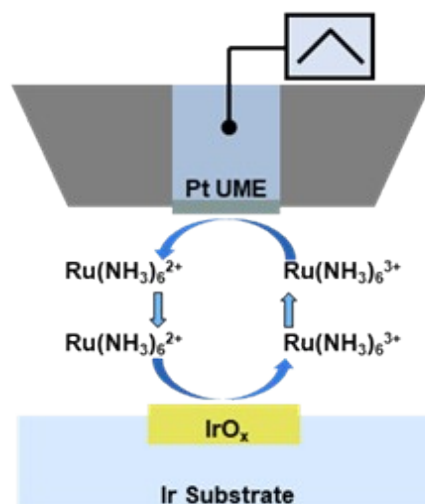

**Fig. S7.** The diagram of the scanning electrochemical microscopy for the electrochemical activity measurement of Ir and IrO<sub>x</sub> mixture. The electrolyte contains 1 mM Ru(NH<sub>3</sub>)<sub>6</sub>Cl<sub>3</sub> and 0.1 M K<sub>2</sub>SO<sub>4</sub>. The motion rate of Pt UME was set as 20 μm/s. The UME-substrate distance was kept constant at 4 μm.

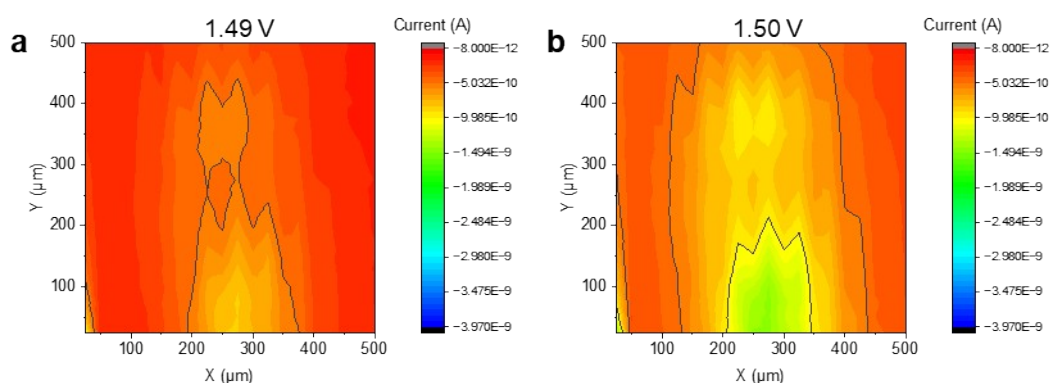

**Fig. S8.** OER activity distribution on the surface of Ir-IrO<sub>x</sub> at potentials of (a) 1.49 V<sub>RHE</sub> and (b) 1.50 V<sub>RHE</sub>. The Pt-tip substrate distance was kept constant at 15 μm.

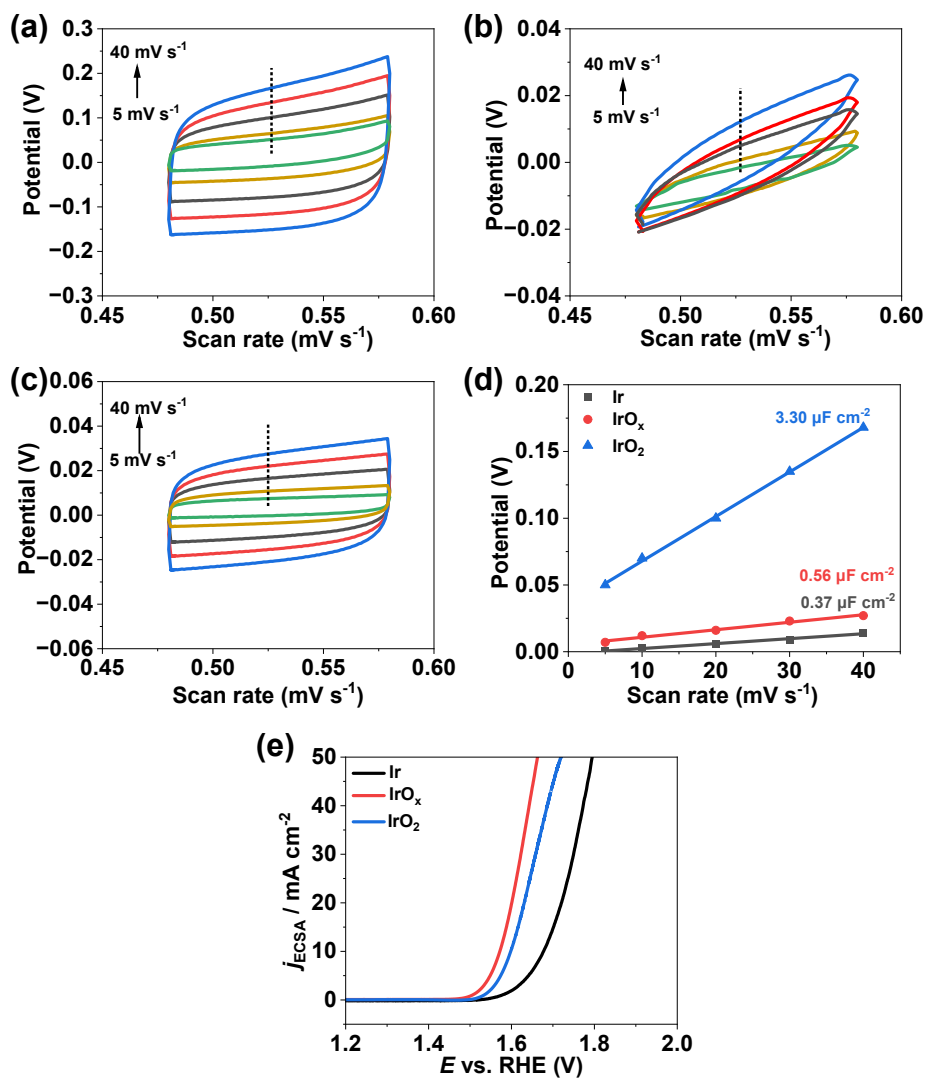

Fig. S9. (a-c) CV curves at different scan rates (5~40 mV s<sup>-1</sup>) for IrO<sub>2</sub>, Ir and IrO<sub>x</sub>. (d) Electrochemical double-layer capacitance. (e) OER activity comparison of IrO<sub>2</sub>, Ir and IrO<sub>x</sub> using ECSA-based analysis.

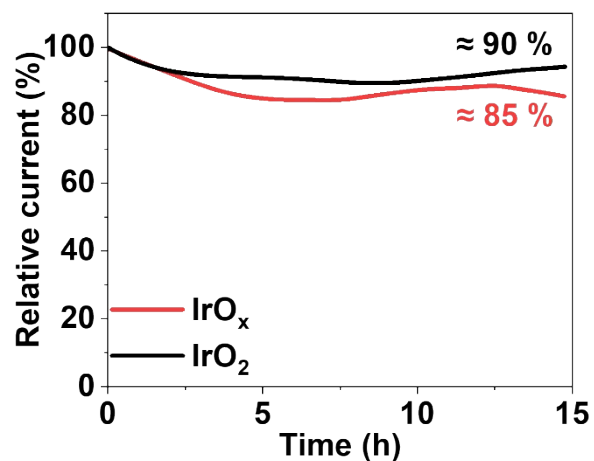

Fig. S10. Chronopotentiometry of OER at constant potential of 1.65 V.

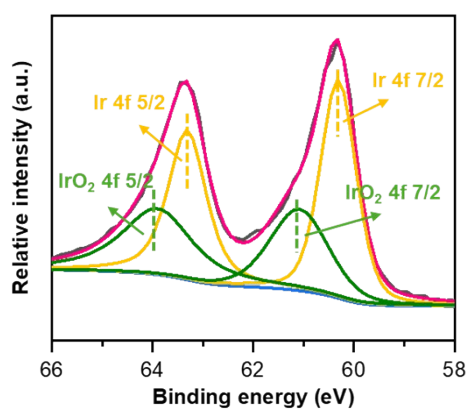

Fig. S11. XPS spectrum of the Ir 4f of the original wear surface on the lower friction pair after the OER measurements.

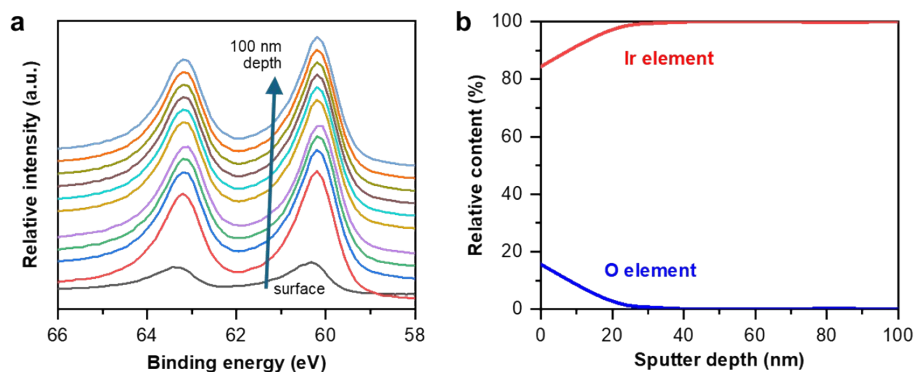

**Fig. S12. XPS spectra of the Ir 4f of the IrO<sub>x</sub> layer after the OER measurements recorded as sputtering depth increases.** (a) Ir 4f XPS spectra at different sputtering depths; (b) relative atomic contents of Ir and O as a function of sputtering depth. Sampling area: 50×50 μm; sputtering depth: 10 nm per interval.

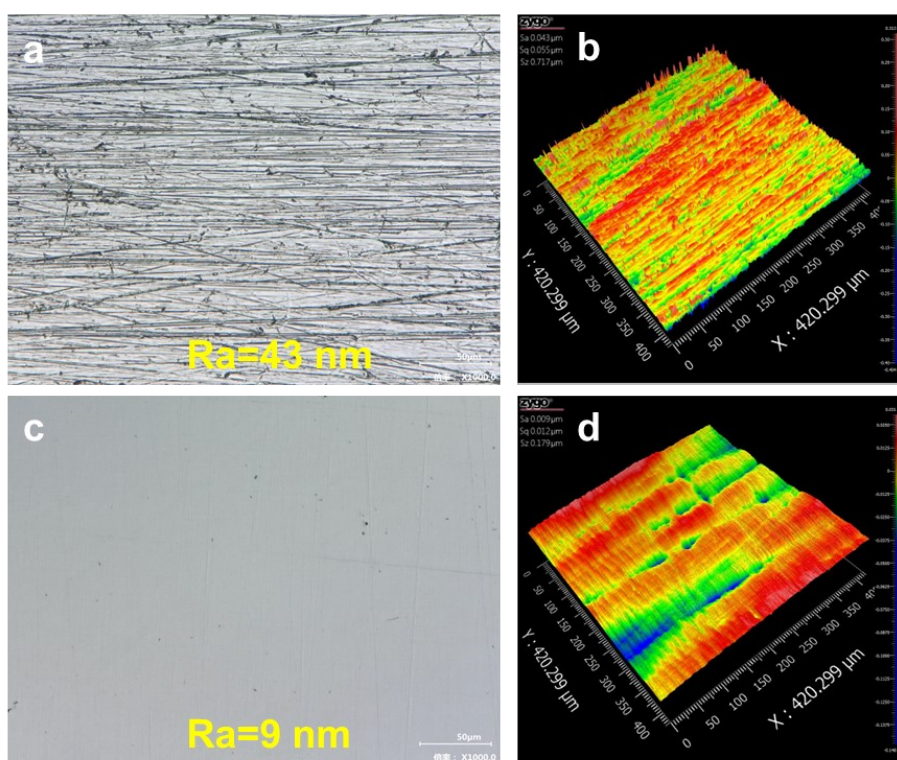

**Fig. S13. Microscopic morphologies of rough and smooth Ir metal surfaces before performing any friction test.** Optical microstructure (a) and 3D morphology (b) of rough surface; Optical microstructure (c) and 3D morphology (d) of smooth surface.

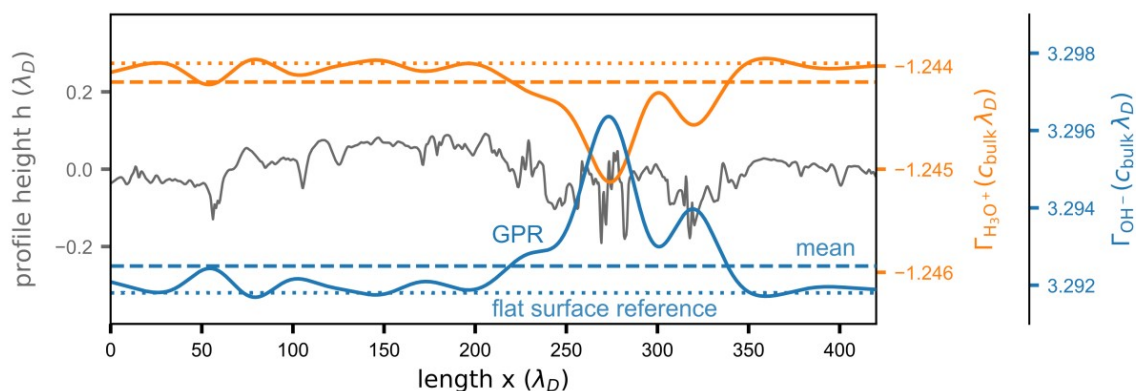

**Fig. S14. Effect of surface potential on the formation of  $\text{IrO}_x$  on Ir surface. The parameters of the friction experiment are marked in the figure.** Delocalized surface excess trends smeared out to larger length scales by Gaussian process regression (GPR) from data in Figure.3D. Dotted lines show the reference surface excess for an ideally flat surface. Dashed lines show the mean surface excess over the whole line scan. The Debye length  $\lambda_D$  serves as the spatial unit. Surface excess  $\Gamma$  is measured in units of  $c_{bulk} \cdot \lambda_D$ . In water of pH 7,  $\lambda_D \approx 1 \mu\text{m}$  and  $c_{bulk} = 10^{-4} \text{mol m}^{-3}$  for both hydronium and hydroxide. A kernel of two summed radial basis functions with the initial hyperparameters length scale 10 and 50 and variance 0.01 for both has been used to perform GPR on the dimensionless data in Figure.3D.

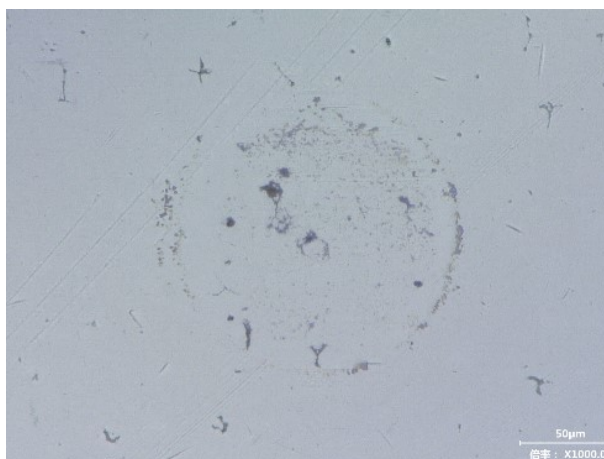

**Fig. S15. Surface morphologies of the  $\text{ZrO}_2$  ball after the friction test of 200 s with pure water as lubricant under a positive surface potential of +0.6 V (Ag/AgCl as the reference electrode).**

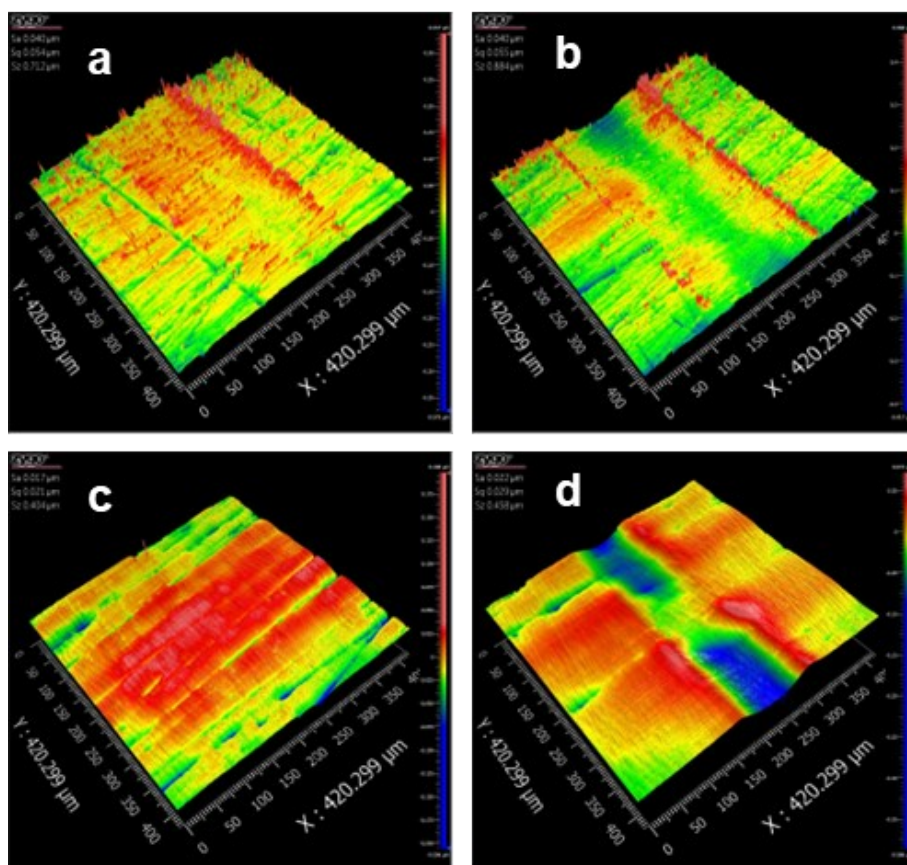

**Fig. S16. 3D morphologies of wear tracks on Ir plates with varying surface roughness under different normal loads.** (a) and (b) show wear tracks on smooth and rough surfaces after friction tests at a 4 N load (1.18 GPa); (c) and (d) show wear tracks on smooth and rough surfaces after tests at a 10 N load (1.62 GPa). All tests were conducted at a surface potential of +0.6 V, a frequency of 3 Hz, and a duration of 200 s.

**Table S1.** Comparison of the overpotential at 10 mA cm<sup>-2</sup>: the friction-induced amorphous IrO<sub>x</sub> layer in this work vs. recently reported amorphous Ir or IrO<sub>x</sub>-based catalysts.

| Catalyst                                                | Electrolyte                          | Overpotential | Reference |
|---------------------------------------------------------|--------------------------------------|---------------|-----------|
| IrO <sub>x</sub>                                        | 0.1 M HClO <sub>4</sub>              | 310           | This work |
| Commercial IrO <sub>2</sub>                             | 0.1 M HClO <sub>4</sub>              | 386           | [1]       |
| Amorphous Ir<br>NSs                                     | 0.1 M HClO <sub>4</sub>              | 255           | [2]       |
| IrO <sub>x</sub> /TiN NPs                               | 0.1 M HClO <sub>4</sub>              | 293           | [3]       |
| IrO <sub>x</sub> /TiO <sub>2</sub>                      | 0.1 M HClO <sub>4</sub>              | 255           | [4]       |
| Pd@Ir                                                   | 0.1 M HClO <sub>4</sub>              | 300           | [5]       |
| Ir-MnO <sub>2</sub>                                     | 0.1 M HClO <sub>4</sub>              | 288           | [6]       |
| 5% Nd-IrO <sub>x</sub>                                  | 0.1 M HClO <sub>4</sub>              | 254           | [7]       |
| IrIrO <sub>x</sub> H <sub>y</sub> Se <sub>z</sub> /H CC | 0.5 M H <sub>2</sub> SO <sub>4</sub> | 308           | [8]       |
| IrNiO <sub>x</sub> /WO <sub>3</sub>                     | 0.5 M H <sub>2</sub> SO <sub>4</sub> | 239           | [9]       |
| RuIrO <sub>x</sub>                                      | 0.5 M H <sub>2</sub> SO <sub>4</sub> | 233           | [10]      |

### Supplementary references:

1. M. Sun, H. Huang, X. Niu, et al., "Grain boundary-derived local amorphization enhances acidic OER," *ACS Catalysis* 14 (2024): 15764. <https://dx.doi.org/10.1021/acscatal.4c03746>.
2. G. Wu, X. Zheng, P. Cui, et al., "A general synthesis approach for amorphous noble metal nanosheets," *Nature Communications* 10 (2019): 4855. <https://dx.doi.org/10.1038/s41467-019-12859-2>.
3. X. Han, T. Mou, A. Islam, et al., "Theoretical prediction and experimental verification of IrO<sub>x</sub> supported on titanium nitride for acidic oxygen evolution reaction," *Journal of the American Chemical Society* 146 (2024): 16499. <https://dx.doi.org/10.1021/jacs.4c02936>.
4. G. Yu, R. Li, Y. Hu, et al., "Supporting IrO<sub>x</sub> nanosheets on hollow TiO<sub>2</sub> for highly efficient acidic water splitting," *Nano Research* 17 (2024): 6903. <https://dx.doi.org/10.1007/s12274-024-6681-7>.
5. F. Xue, X. Guo, B. Min, et al., "Unconventional high-index facet of iridium boosts oxygen evolution reaction: how the facet matters," *ACS Catalysis* 11 (2021): 8239. <https://dx.doi.org/10.1021/acscatal.1c01867>.
6. W. Sun, Z. Wang, X. Tian, et al., "In situ formation of grain boundaries on a supported hybrid to boost water oxidation activity of iridium oxide," *Nanoscale* 13 (2021): 13845. <https://dx.doi.org/10.1039/D1NR01795K>.
7. G. Liu, L. Chen, Z. Liu, et al., "Short-range-engineered Nd-doped IrO<sub>x</sub> enables oxide path mechanism for high-performance PEM water electrolysis," *Small* e11956. <https://dx.doi.org/https://doi.org/10.1002/sml.202511956>.
8. M.-G. Kim, H. J. Lee, T. K. Lee, et al., "Iridium selenium oxyhydroxide shell for polymer electrolyte membrane water electrolyzer with low ir loading," *ACS Energy Letters* 9 (2024): 2876. <https://dx.doi.org/10.1021/acsenergylett.4c00884>.
9. H. Zhang, P. Song, X. Mei, et al., "Amorphous-crystalline interface coupling of IrNiO<sub>x</sub>/WO<sub>3</sub> for efficient and stable acidic water splitting," *ACS Catalysis* 15 (2025): 12395. <https://dx.doi.org/10.1021/acscatal.5c02782>.

10. Z. Zhuang, Y. Wang, C.-Q. Xu, et al., "Three-dimensional open nano-netcage electrocatalysts for efficient pH-universal overall water splitting," *Nature Communications* 10 (2019): 4875. <https://dx.doi.org/10.1038/s41467-019-12885-0>.
